# Supplementary material
Source: MDPI journal article supplement (https://www.mdpi.com/2571-9637/3/1/1)
Supplement: s1 [file s1]

## Supplementary Materials

### Hybrid Cathodes Composed of $\text{K}_3\text{V}_2(\text{PO}_4)_3$ and Carbon Materials with Boosted Charge Transfer for K-Ion Batteries

Xianghua Zhang <sup>1</sup>, Xinyi Kuang <sup>1</sup>, Hanwen Zhu <sup>1</sup>, Ni Xiao <sup>2</sup>, Qi Zhang <sup>1</sup>, Xianhong Rui <sup>1,3,\*</sup>, Yan Yu <sup>3,4,5,\*</sup> and Shaoming Huang <sup>1,\*</sup>

<sup>1</sup> Guangzhou Key Laboratory of Low-Dimensional Materials and Energy Storage Devices, Collaborative Innovation Center of Advanced Energy Materials, School of Materials and Energy, Guangdong University of Technology, Guangzhou 510006, China; xhzhang@mail2.gdut.edu.cn (X.Z.); kxinyi@126.com (X.K.); zhu975181134@163.com (H.Z.); qzhangmse@gdut.edu.cn (Q.Z.)

<sup>2</sup> Aviation Fuel Research & Development Center, China National Aviation Fuel Group Limited, Beijing, 102603, China; xiaoni@cnafl.com

<sup>3</sup> Hefei National Laboratory for Physical Sciences at the Microscale, Department of Materials Science and Engineering, CAS Key Laboratory of Materials for Energy Conversion, University of Science and Technology of China, Hefei, Anhui 230026, China

<sup>4</sup> Dalian National Laboratory for Clean Energy (DNL), Chinese Academy of Sciences, Dalian, Liaoning 116023, China

<sup>5</sup> State Key Laboratory of Fire Science, University of Science and Technology of China, Hefei, Anhui 230026, China

\* Correspondence: xhrui@gdut.edu.cn (X.R.); yanyumse@ustc.edu.cn (Y.Y.); smhuang@gdut.edu.cn (S.H.)

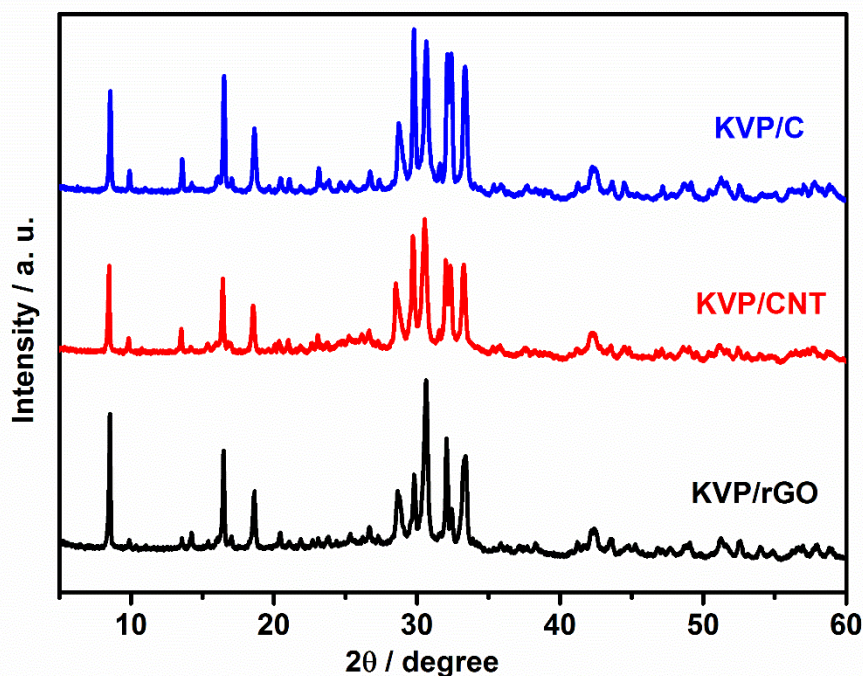

**Figure S1.** XRD patterns of KVP/rGO, KVP/CNT and KVP/C composites, which synthesized under the same ball-milling conditions and annealing process as those of KVP/C/CNT/rGO composite.

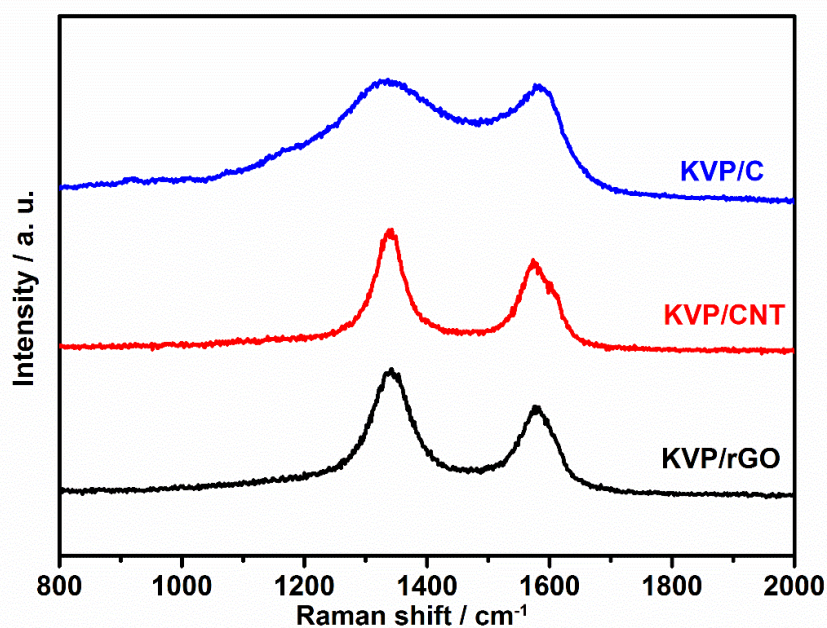

**Figure S2.** Raman spectra of KVP/rGO, KVP/CNT and KVP/C composites. The peak intensity ratios between D and G bands (ID/IG) are calculated to be ~1.38, 1.3, 1.06 for the KVP/rGO, KVP/CNT, KVP/C composites, respectively.

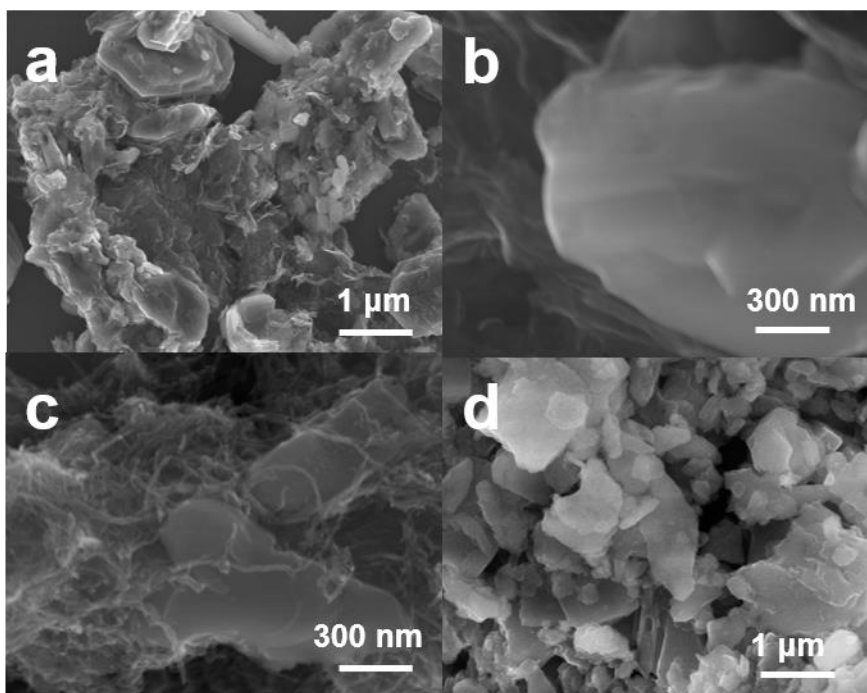

**Figure S3.** SEM images of KVP/rGO (a,b), KVP/CNT (c) and KVP/C (d), respectively. The SEM images display large KVP particles with the diameter range of 1–3  $\mu\text{m}$ , and the carbon coating layers on the KVP particles surface are rather incomplete.

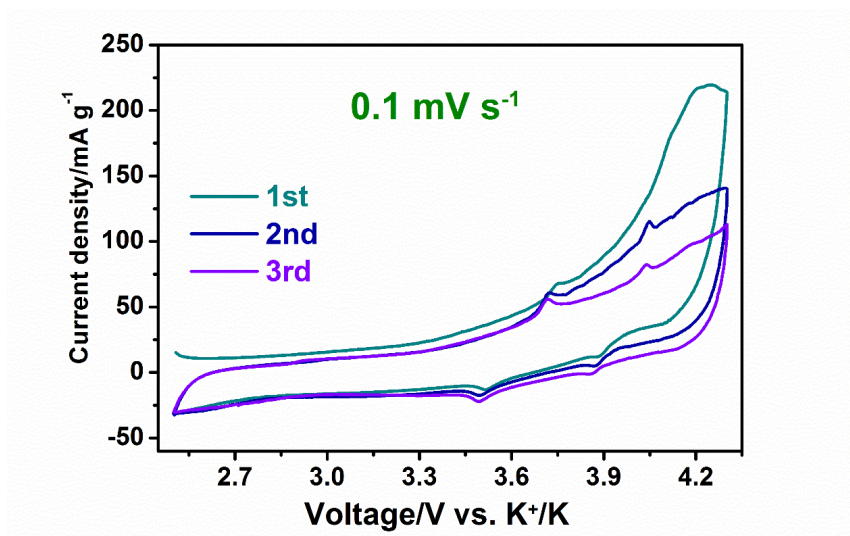

Figure S4. The CV curves of the KVPC/CNT/rGO cathode at a scan rate of  $0.1 \text{ mV s}^{-1}$ .

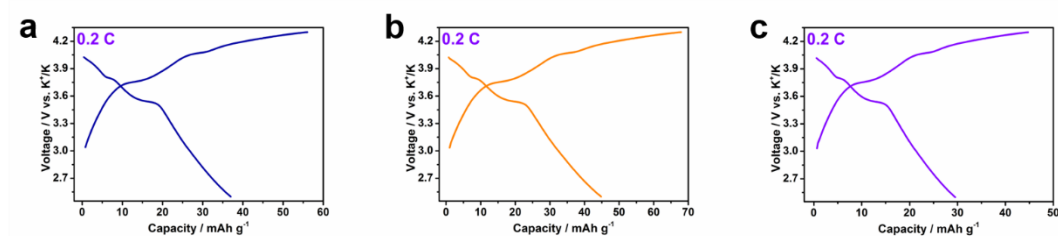

Figure S5. The initial galvanostatic charge/discharge voltage profiles of KVPC/rGO (a), KVPC/CNT (b) and KVPC/C (c) at 0.2C.

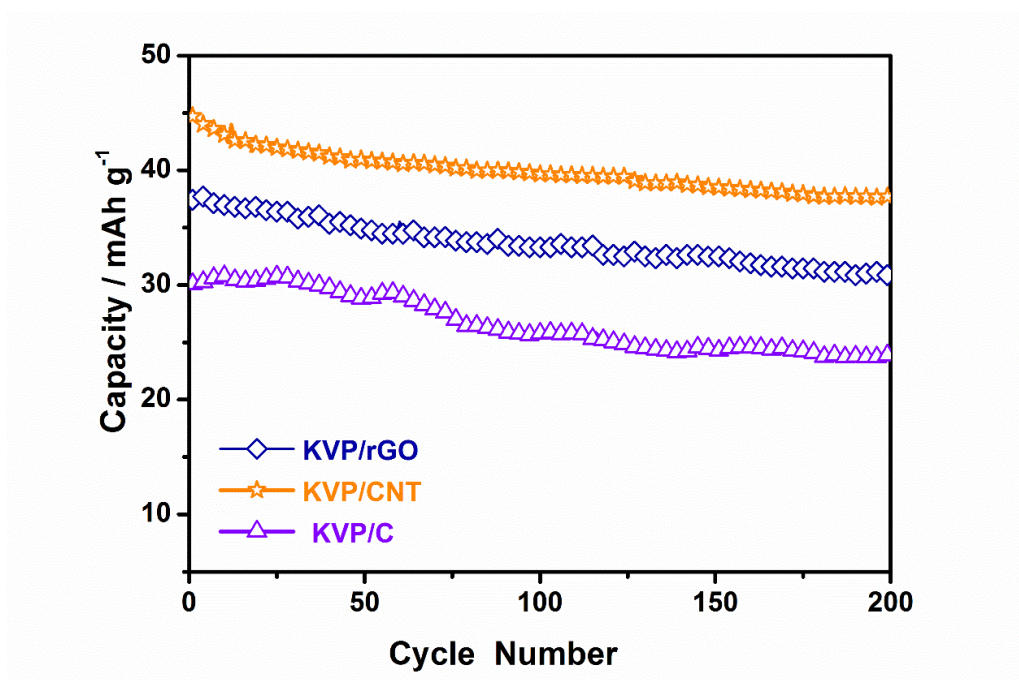

Figure S6. Cycling performance of KVPC/rGO, KVPC/CNT and KVPC/C composites at 0.2C.
